# Supplementary material for: A Diagnostic-Oriented Screening Scale for Anxiety Disorders: The Center for Epidemiologic Studies Anxiety Scale (CESA)
Source: PubMed Central journal article supplement (PMC7265241; doi:10.3389/fpsyg.2020.00957), 2020-05-26
Supplement: Table_1.pdf [file Table_1.pdf]

## Supplementary Material 1

### Original Version of the CESA

#### CENTER FOR EPIDEMIOLOGIC STUDIES ANXIETY SCALE - CESA

|                                                                                                                                                                     | 0            | 1                                                                              | 2                                                      | 3                                                                   |
|---------------------------------------------------------------------------------------------------------------------------------------------------------------------|--------------|--------------------------------------------------------------------------------|--------------------------------------------------------|---------------------------------------------------------------------|
| <b><u>A. Over the last six months:</u></b>                                                                                                                          | No,<br>never | Yes, but<br>never<br>enough to<br>change what<br>I was<br>planning or<br>doing | Yes, and<br>sometimes<br>I avoided<br>the<br>situation | Yes, and<br>I avoided<br>the<br>situation<br>almost all<br>the time |
| 1. Were you afraid of being in a crowd or standing in line?                                                                                                         |              |                                                                                |                                                        |                                                                     |
| 2. Were you afraid of going outside?                                                                                                                                |              |                                                                                |                                                        |                                                                     |
| 3. Were you afraid of being alone?                                                                                                                                  |              |                                                                                |                                                        |                                                                     |
| 4. Were you afraid of speaking in public?                                                                                                                           |              |                                                                                |                                                        |                                                                     |
| 5. Were you afraid of being with people, even friends?                                                                                                              |              |                                                                                |                                                        |                                                                     |
| 6. Were you afraid of seeing blood or getting a shot?                                                                                                               |              |                                                                                |                                                        |                                                                     |
| 7. Were you afraid of seeing a doctor or dentist?                                                                                                                   |              |                                                                                |                                                        |                                                                     |
| <b><u>B. When you were in these situations, did you...</u></b>                                                                                                      | No,<br>Never | Yes,<br>sometimes                                                              | Yes, often                                             | Yes,<br>almost<br>every<br>time                                     |
| 8. Get sweaty?                                                                                                                                                      |              |                                                                                |                                                        |                                                                     |
| 9. Feel your heart pound?                                                                                                                                           |              |                                                                                |                                                        |                                                                     |
| 10. Get short of breath?                                                                                                                                            |              |                                                                                |                                                        |                                                                     |
| 11. Feel dizzy or like fainting?                                                                                                                                    |              |                                                                                |                                                        |                                                                     |
| 12. Tremble?                                                                                                                                                        |              |                                                                                |                                                        |                                                                     |
| 13. Feel pain in your chest?                                                                                                                                        |              |                                                                                |                                                        |                                                                     |
| 14. Feel like you might die?                                                                                                                                        |              |                                                                                |                                                        |                                                                     |
| 15. Feel like throwing up?                                                                                                                                          |              |                                                                                |                                                        |                                                                     |
| 16. Feel like you were choking?                                                                                                                                     |              |                                                                                |                                                        |                                                                     |
| 17. Feel like you were smothering?                                                                                                                                  |              |                                                                                |                                                        |                                                                     |
| 18. Feel like everything was unreal?                                                                                                                                |              |                                                                                |                                                        |                                                                     |
| 19. Feel tingling in your hands or feet?                                                                                                                            |              |                                                                                |                                                        |                                                                     |
|                                                                                                                                                                     | No,<br>never | Once or<br>twice                                                               | Three<br>times or<br>more                              | Many<br>times                                                       |
| <b>C. 20. Did these feelings ever happen suddenly—say, over 5-10 minutes-- with no clear explanation—that is, even you were not in one of the situations above?</b> |              |                                                                                |                                                        |                                                                     |
