# Supplementary material for: A Diagnostic-Oriented Screening Scale for Anxiety Disorders: The Center for Epidemiologic Studies Anxiety Scale (CESA)
Source: PubMed Central journal article supplement (PMC7265241; doi:10.3389/fpsyg.2020.00957), 2020-05-26
Supplement: Table_2.pdf [file Table_2.pdf]

## Supplementary Material 2

### Brazilian Portuguese Version of the CESA

#### CENTRO PARA ESTUDOS EPIDEMIOLÓGICOS – ESCALA DE ANSIEDADE (CESA)

|                                                                                                                                                                                               | 0          | 1                                                                            | 2                                   | 3                                          |
|-----------------------------------------------------------------------------------------------------------------------------------------------------------------------------------------------|------------|------------------------------------------------------------------------------|-------------------------------------|--------------------------------------------|
| <b>A. Nos últimos 6 meses, você...</b>                                                                                                                                                        | Não, nunca | Sim, mas nunca o suficiente para mudar o que eu estava planejando ou fazendo | Sim e às vezes eu evitei a situação | Sim e evitei a situação quase o tempo todo |
| 1. Teve receio de estar em uma multidão ou em pé numa fila?                                                                                                                                   |            |                                                                              |                                     |                                            |
| 2. Teve receio de ir à rua?                                                                                                                                                                   |            |                                                                              |                                     |                                            |
| 3. Teve receio de ficar sozinho(a)?                                                                                                                                                           |            |                                                                              |                                     |                                            |
| 4. Teve receio de falar em público?                                                                                                                                                           |            |                                                                              |                                     |                                            |
| 5. Teve receio de estar com as pessoas, mesmo que sejam amigas?                                                                                                                               |            |                                                                              |                                     |                                            |
| 6. Teve receio de ver sangue ou tomar uma injeção?                                                                                                                                            |            |                                                                              |                                     |                                            |
| 7. Teve receio de ir ao médico ou dentista?                                                                                                                                                   |            |                                                                              |                                     |                                            |
| <b>B. Tendo passado ou não por essas situações, nos últimos 6 meses você...</b>                                                                                                               | Não, nunca | Sim, às vezes                                                                | Sim, frequentemente                 | Sim, quase a todo o tempo                  |
| 1. Suou demais?                                                                                                                                                                               |            |                                                                              |                                     |                                            |
| 2. Sentiu o coração bater muito rápido?                                                                                                                                                       |            |                                                                              |                                     |                                            |
| 3. Ficou com dificuldade de respirar?                                                                                                                                                         |            |                                                                              |                                     |                                            |
| 4. Sentiu tontura e como se fosse desmaiar?                                                                                                                                                   |            |                                                                              |                                     |                                            |
| 5. Ficou tremendo?                                                                                                                                                                            |            |                                                                              |                                     |                                            |
| 6. Sentiu uma dor ou aperto no peito?                                                                                                                                                         |            |                                                                              |                                     |                                            |
| 7. Sentiu que iria morrer?                                                                                                                                                                    |            |                                                                              |                                     |                                            |
| 8. Ficou com vontade de vomitar?                                                                                                                                                              |            |                                                                              |                                     |                                            |
| 9. Sentiu como se estivesse engasgando e ficando sem ar?                                                                                                                                      |            |                                                                              |                                     |                                            |
| 10. Sentiu como se estivesse ficando sufocado(a)?                                                                                                                                             |            |                                                                              |                                     |                                            |
| 11. Sentiu como se tudo não parecesse ser real?                                                                                                                                               |            |                                                                              |                                     |                                            |
| 12. Sentiu formigamento nas mãos ou nos pés?                                                                                                                                                  |            |                                                                              |                                     |                                            |
|                                                                                                                                                                                               | Não, nunca | Uma ou duas vezes                                                            | Três vezes ou mais                  | Muitas vezes                               |
| <b>C. 20. Essas sensações (Parte B) já aconteceram de repente – digamos, por 5-10 minutos – sem um motivo claro – isto é, mesmo você não estando em alguma das situações acima (Parte A)?</b> |            |                                                                              |                                     |                                            |
