# Supplementary material for: A Diagnostic-Oriented Screening Scale for Anxiety Disorders: The Center for Epidemiologic Studies Anxiety Scale (CESA)
Source: PubMed Central journal article supplement (PMC7265241; doi:10.3389/fpsyg.2020.00957), 2020-05-26
Supplement: Table_3.pdf [file Table_3.pdf]

## Supplementary Material 3

### Center for Epidemiologic Studies Anxiety Scale - CESA

#### Algorithm for Diagnosis

##### *Anxiety Score (Any Anxiety Disorder)*

Anxiety Score: sum of items 1-20 (range 0-60)

Negative (“not anxious”): 0-15 total score, with no items at level 3

Positive (“anxious”): total score equal or above 16, or at least one item at level 3

##### *Agoraphobia (items 1-3)*

Negative: sum of zero

Possible: sum of 1-3 (no score of 3)

Probable: sum of 4-6 (no score of 3)

Highly probable: sum of 7-9

##### *Social Phobia (items 4 and 5)*

Negative: sum of zero

Possible: sum of 1-2 (no score of 3)

Probable: sum of 3-4 (no score of 3)

Highly probable: sum of 5-6

##### *Blood-Illness Phobia (items 6 and 7)*

Negative: sum of zero

Possible: sum of 1-2 (no score of 3)

Probable: sum of 3-4 (no score of 3)

Highly probable: sum of 5-6

##### *Panic Disorder*

Negative: 0 in item 20

Possible: 1 on item 20, sum of items 8-19  $\geq 8$ , 1 or more answer = 3 on items 8-19

Probable: 2 on item 20, sum of items 8-19  $\geq 10$ , 2 or more answer = 3 on items 8-19

Highly Probable: 3 on item 20, sum of items 8-19  $\geq 12$ , 3 or more answers = 3 on items 8-19
